# Supplementary material for: Climate Change and Rainfall Intensity–Duration–Frequency Curves: Overview of Science and Guidelines for Adaptation
Source: Atypon-hosted journal article supplement (doi:10.1061/(asce)he.1943-5584.0002122), 2021-08-03
Supplement: supplemental materials_he.1943-5584.0002122_martel.pdf [file supplemental%20materials_he.1943-5584.0002122_martel.pdf]

## SUPPLEMENTAL MATERIALS

*ASCE Journal of Hydrologic Engineering*

# Climate Change and Rainfall Intensity– Duration–Frequency Curves: Overview of Science and Guidelines for Adaptation

Jean-Luc Martel, François P. Brissette, Philippe Lucas-Picher,  
Magali Troin, and Richard Arsenault

**DOI:** 10.1061/(ASCE)HE.1943-5584.0002122

© ASCE 2021

[www.ascelibrary.org](http://www.ascelibrary.org)

Table S1. Synthesis of 58 selected studies on rainfall extremes under climate change.

| Reference                     | Location    | Climate model simulations |     |     |                 |          | GHG emission scenario |         |         |         |       | Extreme rainfall indicator    | Return period | Future period                     | Studies that investigated <sup>a</sup> |                                  |
|-------------------------------|-------------|---------------------------|-----|-----|-----------------|----------|-----------------------|---------|---------|---------|-------|-------------------------------|---------------|-----------------------------------|----------------------------------------|----------------------------------|
|                               |             | GCM                       | RCM | CPM | Multiple models | Ensemble | RCP 8.5               | RCP 6.0 | RCP 4.5 | RCP 2.6 | Other |                               |               |                                   | different frequencies <sup>b</sup>     | the sub-daily scale <sup>c</sup> |
| Kharin et al., 2013           | World       | X                         |     |     | X               |          | X                     |         | X       | X       |       | Rx1day                        | 20-yr         | 2046-65;<br>2081-2100             |                                        |                                  |
| Fischer et al., 2014          | World       | X                         |     |     | X               |          | X                     |         |         |         |       | Rx1day                        | N/A           | 2006-2100                         |                                        | X                                |
| Kendon et al., 2014           | UK          |                           | X   | X   | X               |          | X                     |         |         |         |       | R95p                          | N/A           | 2086-99                           |                                        | X                                |
| Srivastav et al., 2014        | Canada      | X                         |     |     |                 |          | X                     | X       | X       | X       |       | IDF curves                    | 2- to 100-yr  | 2006-2100                         | X                                      |                                  |
| Arnbjerg-Nielsen et al., 2015 | Denmark     | X                         |     |     | X               |          | X                     |         |         |         | X     | Hourly and daily rainfall     | 2- to 1000-yr | 2071-2100                         | X                                      | X                                |
| Ban et al., 2015              | Europe      |                           |     | X   | X               | X        | X                     |         |         |         |       | R97.5p, R99p, R99.9p, R99.99p | N/A           | 2081-90                           |                                        | X                                |
| Chandra et al., 2015          | India       | X                         |     |     | X               |          | X                     | X       | X       | X       |       | IDF curves                    | N/A           | 2021-50,<br>2051-80,<br>2071-2100 | X                                      | X                                |
| Fischer and Knutti, 2015      | World       | X                         |     |     | X               |          | X                     |         | X       |         |       | R99p, R99.5p                  | N/A           | 30-yr                             |                                        |                                  |
| Pendergrass et al., 2015      | World       | X                         |     |     | X               |          | X                     | X       | X       |         |       | Rx1day                        | N/A           | 2071-2100                         |                                        |                                  |
| Donat et al., 2016            | World       | X                         |     |     | X               |          | X                     |         | X       |         |       | RX1day                        | N/A           | 2070-99                           |                                        |                                  |
| Lima et al., 2016             | South Korea |                           | X   |     |                 |          | X                     | X       |         |         |       | IDF curves                    | 2- to 100-yr  | 2011-2100                         | X                                      |                                  |
| Tabari et al., 2016           | Belgium     | X                         |     | X   | X               |          |                       |         |         |         | X     | IDF curves                    | 1- and 10-yr  | 2060-69<br>2071-2100              |                                        | X                                |
| Alexander and Arblaster, 2017 | Australia   | X                         |     |     | X               |          | X                     |         | X       |         |       | R95p, R99p, Rx1day, Rx5day    | N/A           | 2046-65;<br>2081-2100             |                                        |                                  |
| Bao et al., 2017              | Australia   |                           | X   |     | X               | X        | X                     |         |         |         |       | R99p                          | N/A           | 2060-79                           |                                        |                                  |
| Fadhel et al., 2017           | England     |                           | X   |     |                 | X        |                       |         |         |         | X     | IDF curves                    | 5-yr          | 2069-98                           |                                        |                                  |
| Kendon et al., 2017           | UK          |                           |     | X   | X               |          | X                     |         |         |         |       | Rx1hr to Rx24hr               | N/A           | 2087-2100                         | X                                      | X                                |
| Mantegna et al., 2017         | Australia   |                           |     | X   | X               |          |                       |         |         |         | X     | IDF curves                    | N/A           | 2070-99                           | X                                      | X                                |
| Pfahl et al., 2017            | World       | X                         |     |     | X               |          |                       |         |         |         |       | Rx1day                        | N/A           | 1950-2100                         |                                        |                                  |
| Prein et al., 2017            | US          | X                         |     |     | X               |          | X                     |         |         |         |       | R97.5p, R99.95p               | N/A           | 2071-2100                         | X                                      | X                                |
| Rajczak and Schär, 2017       | Europe      |                           | X   |     | X               | X        | X                     |         | X       | X       |       | R99p, Rx1day, Rx5day          | 5- to 100-yr  | 2070-99                           |                                        |                                  |
| Aalbers et al., 2018          | Europe      |                           | X   |     |                 | X        | X                     |         |         |         |       | Rx1day                        | 10- and 20-yr | 2071-2100                         | X                                      |                                  |
| Eekhout et al., 2018          | Spain       |                           | X   |     | X               |          | X                     |         | X       |         |       | R95p                          | N/A           | 2031-50;<br>2081-2100             |                                        |                                  |

|                                 |               |      |   |   |   |   |   |   |   |                         |                         |                                   |   |   |
|---------------------------------|---------------|------|---|---|---|---|---|---|---|-------------------------|-------------------------|-----------------------------------|---|---|
| Forestieri et al., 2018         | Italy         |      | X |   | X |   |   |   |   | IDF curves              | 5- to 100-yr            | 2005-50;<br>2050-2100             | X |   |
| Kharin et al., 2018             | World         | X    |   |   | X |   | X | X |   | Rx1day                  | 20- and 50-yr           | 2005-2100                         |   |   |
| Hosseinzadehtalaei et al., 2018 | Belgium       |      | X |   | X |   |   |   | X | IDF curves              | 1-month, 1-yr and 10-yr | 2071-2100                         | X |   |
| Nie et al., 2018                | US            | X    |   |   | X | X | X |   |   | N/A                     | N/A                     | 2090-99                           |   |   |
| Pendergrass, 2018               | World         | N.A. |   |   |   |   |   |   |   | R95p                    | N/A                     | N.A.                              | X |   |
| Ragno et al., 2018              | US            | X    |   |   | X |   |   |   | X | IDF curves              | 2- to 100-yr            | 2050-99                           | X |   |
| Berg et al., 2019               | Europe        |      | X |   | X |   |   |   | X | Rx1hr                   | 5- to 100-yr            | 2011-40;<br>2041-70;<br>2071-2100 |   | X |
| Butcher and Zi, 2019            | US            | X    |   |   | X |   |   |   | X | IDF curves              | 2- to 1000-yr           | 2035-65;<br>2070-2100             | X |   |
| Cannon and Innocenti, 2019      | North America |      |   |   | X |   |   |   |   | IDF curves              | 2- to 100-yr            | 2071-2100                         | X |   |
| Fluixa-Sanmartin et al., 2019   | Spain         |      | X |   | X |   |   |   | X | IDF curves              | 2 to 100 000 yr         | 2010-39,<br>2040-69,<br>2070-99   | X |   |
| Ganguli and Coulibaly, 2019     | Canada        |      | X |   | X |   |   |   |   | IDF curves              | 5- to 25-yr             | 2030-70                           | X |   |
| Hodnebrog et al., 2019          | Europe        | X    | X | X | X |   |   |   |   | Rx10min, Rx1hr, Rx1day  | N/A                     | 2081-2100                         |   | X |
| Innocenti et al., 2019          | North America |      | X |   |   | X | X |   |   | Rx1hr to Rx72hr         | N/A                     | 2006-2099                         | X | X |
| Kendon et al., 2019             | Africa        |      | X | X | X |   |   |   |   | R95p                    | N/A                     | 2090-2100                         |   |   |
| Morrison et al., 2019           | World         | X    |   |   | X |   | X | X | X | Rx3hr, Rx1day           | N/A                     | 2026-45;<br>2081-2100             |   | X |
| Myhre et al., 2019              | Europe        | X    |   |   | X |   |   |   |   | R99p, Rx1day            | N/A                     | 2071-2100                         |   |   |
| Schardong and Simonovic, 2019   | Canada        | X    | X |   | X |   |   |   |   | IDF curves              | 2- to 100-yr            | 2020-2100                         | X |   |
| Vanden Broucke et al., 2019     | Europe        |      | X | X | X |   |   |   |   | R95p, R99p              | N/A                     | 2069-99                           |   | X |
| Ban et al., 2020                | Europe        |      |   | X | X | X | X |   |   | Rx1hr, Rx1day, Rx5day   | 2- to 100-yr            | 2081-90                           | X | X |
| Donat et al., 2020              | World         | X    |   |   | X |   |   |   |   | Rx1day                  | N/A                     | 2081-2100                         |   |   |
| Fosser et al., 2020             | Europe        |      | X | X | X | X | X |   |   | Rx1hr to Rx48hr         | N/A                     | 2060-80                           |   | X |
| Helsen et al., 2020             | Europe        |      | X | X | X |   |   |   |   | R95p to R99.995p        | N/A                     | 2070-2100                         | X |   |
| Hosseinzadehtalaei et al., 2020 | Europe        | X    | X |   | X |   |   |   | X | Rx3hour, Rx1day         | 2- to 100-yr            | 2041-70;<br>2071-2100             | X | X |
| Huo et al., 2021                | Europe        | X    |   |   | X |   |   |   | X | Rx1day, Rx5day, Rx15day | 5- to 200-yr            | 2006-99                           | X |   |
| Khazaei, 2021                   | Iran          | X    |   |   | X |   |   |   | X | IDF curves              | 2- and 15-yr            | 2036-65                           | X |   |
| Kichmeier-Young and Zhang, 2020 | North America | X    | X |   | X | X | X |   |   | Rx1day, Rx5day          | 20- to 100-yr           | 1961-2100                         | X |   |

|                                  |        |   |   |   |   |   |   |                                    |              |                       |   |   |
|----------------------------------|--------|---|---|---|---|---|---|------------------------------------|--------------|-----------------------|---|---|
| Knist et al., 2020               | Europe |   | X | X | X |   | X | R95p, R99.9p,<br>R99.99p           | N/A          | 2038-50;<br>2088-2100 |   | X |
| Li et al., 2020                  | World  | X |   |   | X |   |   | Rx1day, Rx5day                     | 2- to 50-yr  | 2071-2100             | X |   |
| Martel et al., 2020              | World  | X | X |   | X | X | X | Rx1hr to Rx5day                    | 2- to 100-yr | 2080-99               | X | X |
| Tabari et al., 2020              | World  | X |   |   | X |   | X | N/A                                | 30-yr        | 2070-2099             |   |   |
| Wood and Ludwig,<br>2020         | Europe |   | X |   |   | X | X | Rx3hr, Rx1day,<br>Rx5day           | N/A          | 2070-99               |   | X |
| Lenderink et al.,<br>2021        | Europe |   |   | X |   | X |   | R90p, R99p, R99.9p                 | N/A          | 2089-2099             | X | X |
| Luu et al., 2021                 | France |   |   | X | X | X | X | Rx3hr, Rx1day                      | N/A          | 2001-2030             | X | X |
| Moustakis et al.,<br>2021        | US     |   |   | X |   |   | X | R90p, R95p, R98p,<br>R99p, R99.5p  | 20-yr        | 2071-2100             | X | X |
| Pichelli et al., 2021            | Europe |   | X | X | X | X | X | R99p, R99.9p                       | N/A          | 2041-50;<br>2090-99   | X |   |
| Vergara-Temprado<br>et al., 2021 | Europe |   | X | X | X |   | X | R99p, R99.9p,<br>R99.99p, R99.999p | N/A          | 2090-2100             |   | X |

Rx1(a)(b): maximum rainfall index where (a) is the time step and (b) the units.

R(c)p: rainfall percentile where (c) is the percentile value

<sup>a</sup>All studies referenced have shown an increase in extreme rainfall

<sup>a</sup>All studies that have investigated different frequencies have shown larger increases for longer return periods

<sup>a</sup>All studies that have investigated sub-daily time scale have shown larger increases for shorter durations

Table S2. List of the 26 CMIP5 models and simulations used.

| #  | Institution  | Model name     | Historical | RCP4.5 | RCP8.5 |
|----|--------------|----------------|------------|--------|--------|
| 1  | CSIRO-BOM    | ACCESS1.0      | x          | x      | x      |
| 2  | CSIRO-BOM    | ACCESS1.3      | x          | x      | x      |
| 3  | BCC          | BCC-CSM1.1     | x          | x      | x      |
| 4  | BCC          | BCC-CSM1.1(m)  | x          | x      | x      |
| 5  | CCCMA        | CanESM2        | x          | x      | x      |
| 6  | CMCC         | CMCC-CESM      | x          |        | x      |
| 7  | CMCC         | CMCC-CM        | x          | x      | x      |
| 8  | CMCC         | CMCC-CMS       | x          | x      | x      |
| 9  | CNRM-CERFACS | CNRM-CM5       | x          | x      | x      |
| 10 | CSIRO-QCCCE  | CSIRO-Mk3.6.0  | x          | x      | x      |
| 11 | LASG-CESS    | FGOALS-s2      | x          | x      | x      |
| 12 | NOAA-GFDL    | GFDL-CM3       | x          | x      | x      |
| 13 | NOAA-GFDL    | GFDL-ESM2G     | x          | x      | x      |
| 14 | NOAA-GFDL    | GFDL-ESM2M     | x          | x      | x      |
| 15 | MOHC         | HadGEM2-CC     | x          | x      | x      |
| 16 | MOHC         | HadGEM2-ES     | x          | x      | x      |
| 17 | INM          | INM-CM4        | x          | x      | x      |
| 18 | IPSL         | IPSL-CM5A-LR   | x          | x      | x      |
| 19 | IPSL         | IPSL-CM5A-MR   | x          | x      | x      |
| 20 | IPSL         | IPSL-CM5B-LR   | x          | x      | x      |
| 21 | MIROC        | MIROC5         | x          | x      | x      |
| 22 | MIROC        | MIROC-ESM      | x          | x      | x      |
| 23 | MIROC        | MIROC-ESM-CHEM | x          | x      | x      |
| 24 | MPI-M        | MPI-ESM-LR     | x          | x      | x      |
| 25 | MPI-M        | MPI-ESM-MR     | x          | x      | x      |
| 26 | NCC          | NorESM1-M      | x          | x      | x      |

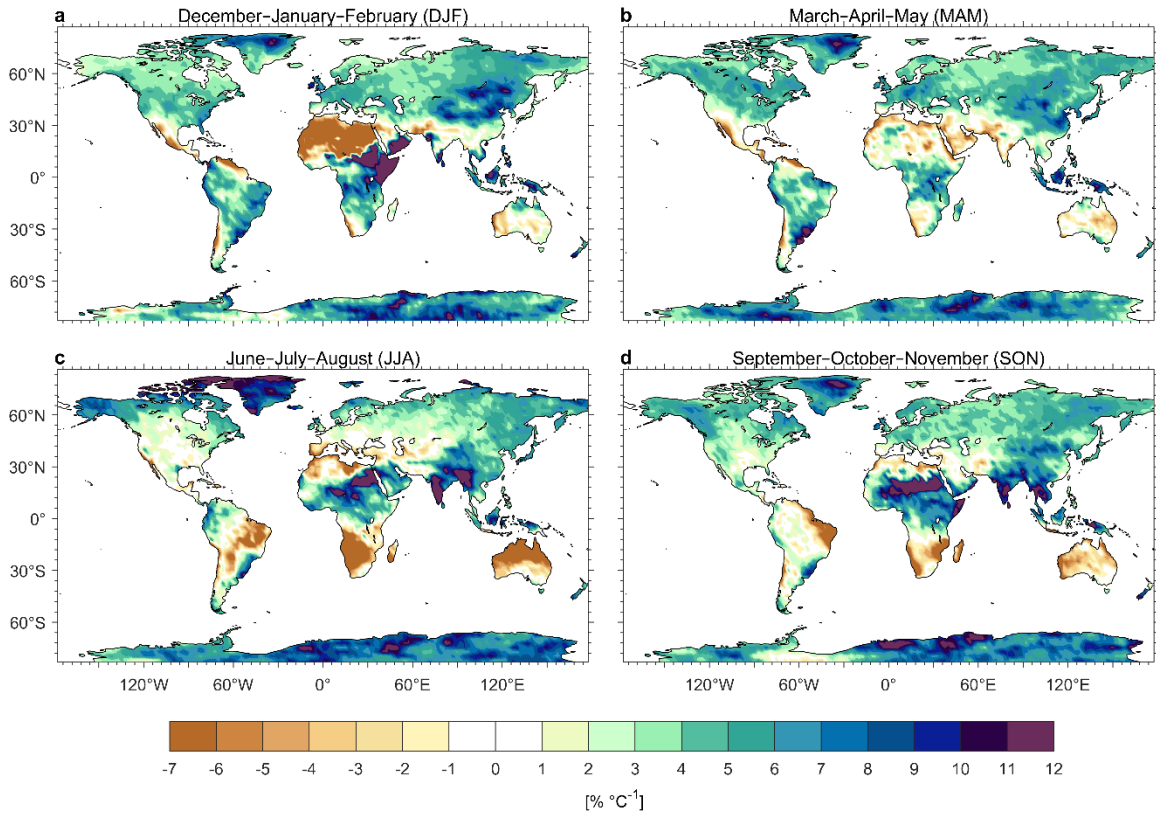

Fig. S1. Seasonal scaling rates ( $\% \text{ } ^\circ\text{C}^{-1}$ ) of daily maximum rainfall (Rx1day) for DJF (a), MAM (b), JJA (c) and SON (d) with respect to global mean temperature changes for the RCP4.5 scenario.

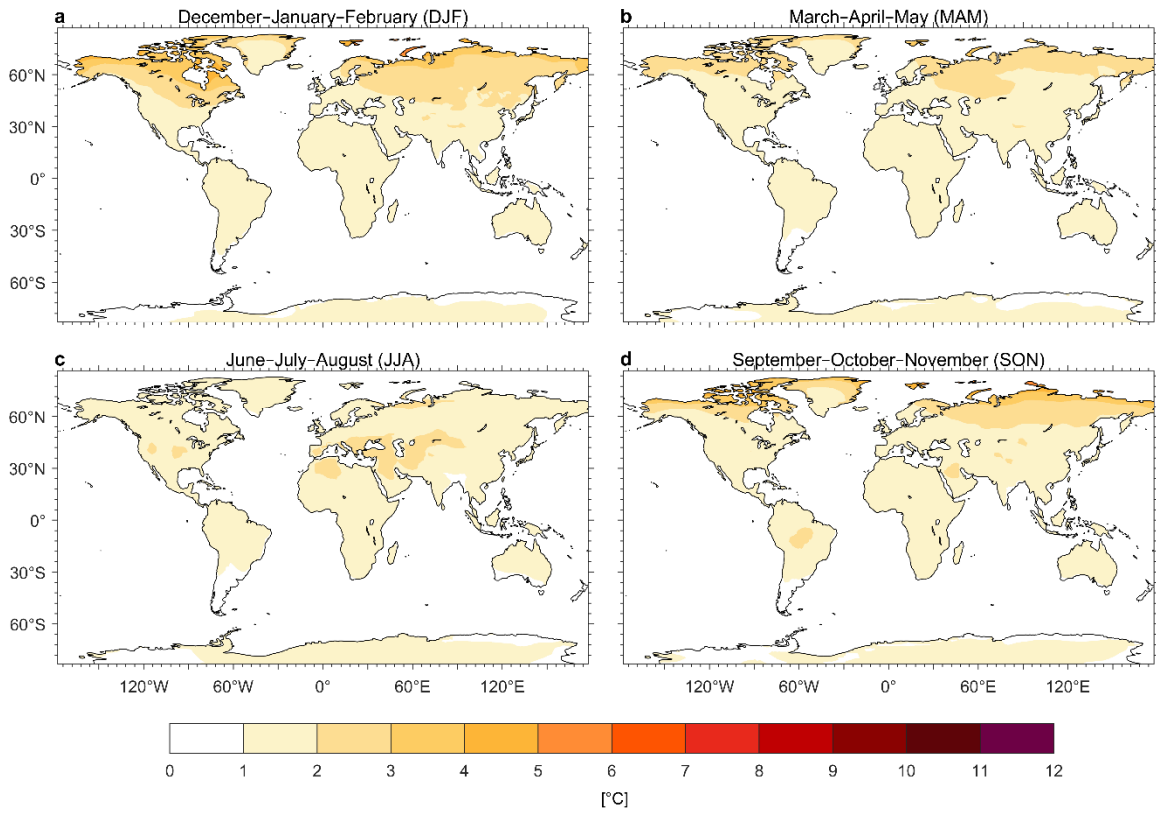

Fig. S2. Seasonal temperature change ( $^{\circ}\text{C}$ ) for DJF (a), MAM (b), JJA (c) and SON (d) between the future (2021-2040) and reference (1981-2000) periods for the RCP8.5 scenario.

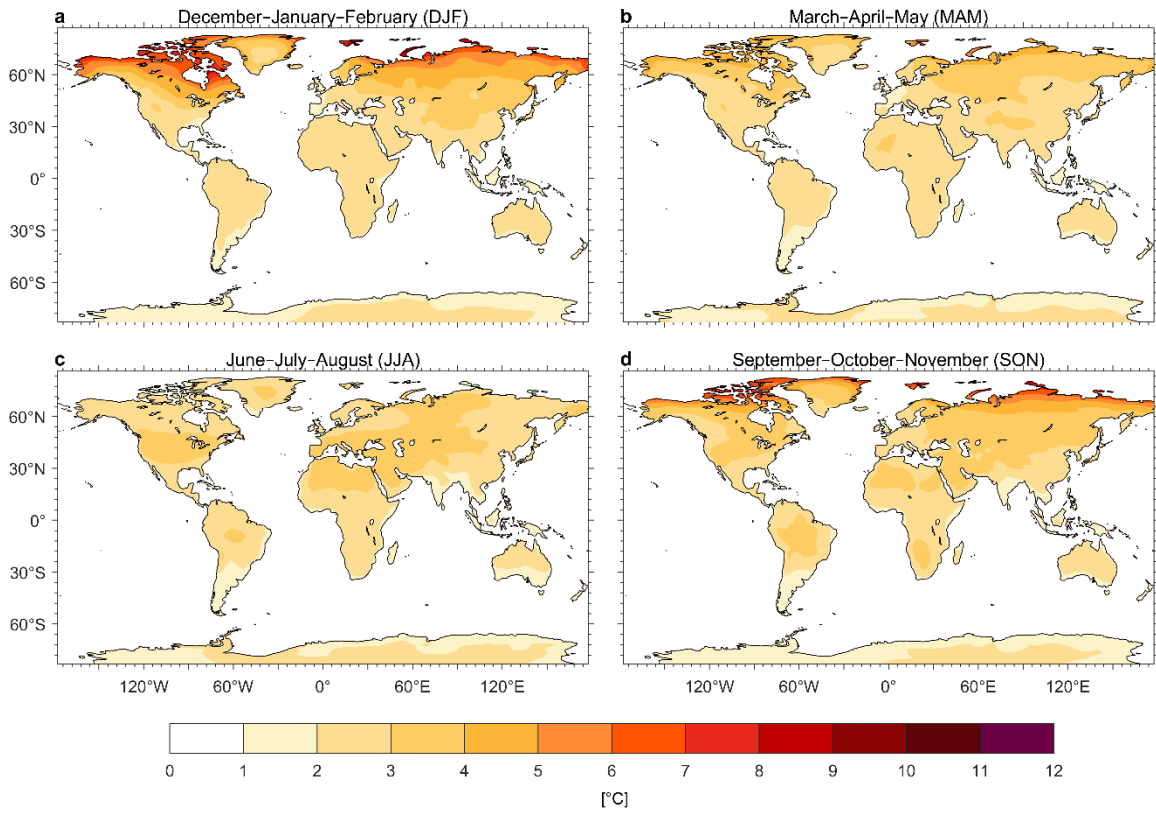

Fig. S3. Same as Fig. S2, but for the future (2041-2060) period.



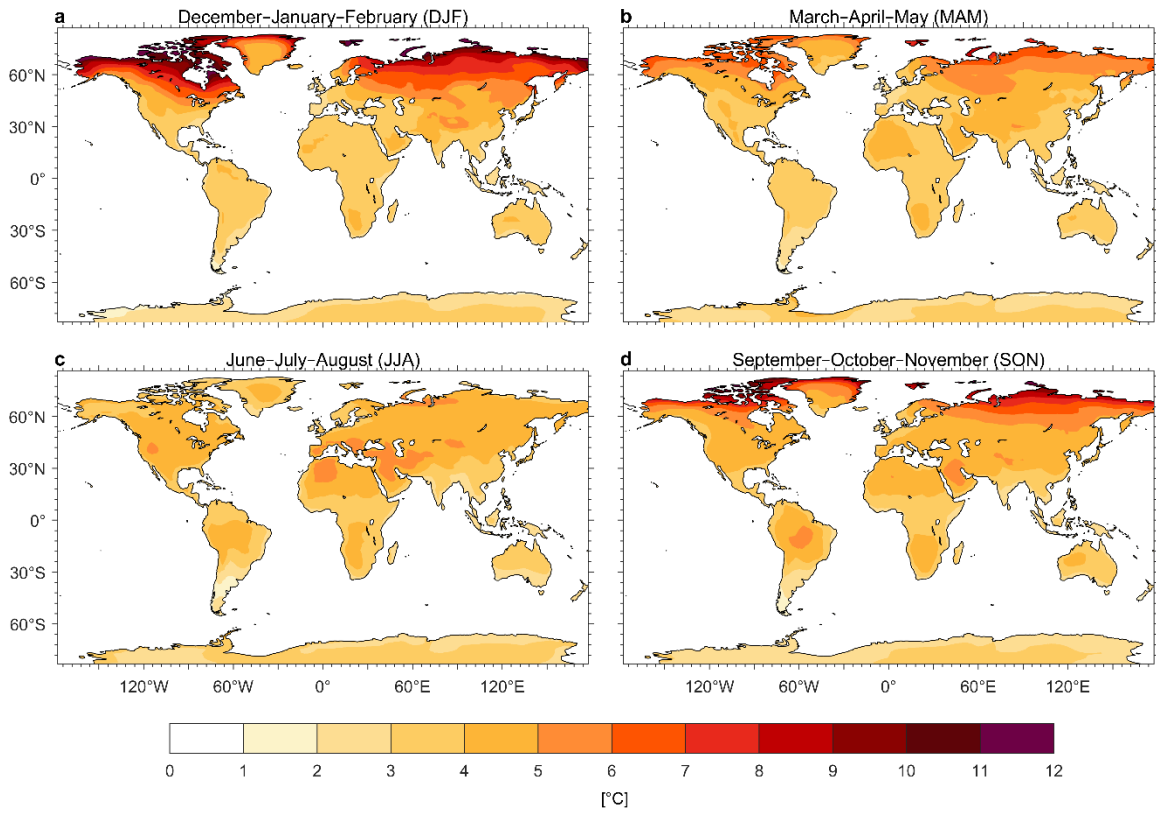

Fig. S4. Same as Fig. S2, but for the future (2061-2080) period.

## References

- Aalbers, E. E., G. Lenderink, E. van Meijgaard, and B. J. J. M. van den Hurk (2018). "Local-scale changes in mean and heavy precipitation in Western Europe, climate change or internal variability?" *Climate Dynamics*, 50(11), 4745-4766. <https://doi.org/10.1007/s00382-017-3901-9>.
- Alexander, L. V., and J. M. Arblaster (2017). "Historical and projected trends in temperature and precipitation extremes in Australia in observations and CMIP5." *Weather and Climate Extremes*, 15, 34-56. <https://doi.org/10.1016/j.wace.2017.02.001>.
- Arnbjerg-Nielsen, K., L. Leonardsen, and H. Madsen (2015). "Evaluating adaptation options for urban flooding based on new high-end emission scenario regional climate model simulations." *Climate Research*, 64(1), 73-84. <https://doi.org/10.3354/cr01299>.
- Ban, N., J. Schmidli, and C. Schär (2015). "Heavy precipitation in a changing climate: Does short-term summer precipitation increase faster?" *Geophysical Research Letters*, 42(4), 1165-1172. <https://doi.org/10.1002/2014GL062588>.
- Ban, N., J. Rajczak, J. Schmidli, and C. Schär (2020). "Analysis of Alpine precipitation extremes using generalized extreme value theory in convection-resolving climate simulations." *Climate Dynamics*, 55(1), 61-75. <https://doi.org/10.1007/s00382-018-4339-4>.
- Bao, J., S. C. Sherwood, L. V. Alexander, and J. P. Evans (2017). "Future increases in extreme precipitation exceed observed scaling rates." *Nature Climate Change*, 7(2), 128-132. <https://doi.org/10.1038/nclimate3201>.
- Berg, P., O. B. Christensen, K. Klehmet, G. Lenderink, J. Olsson, C. Teichmann, and W. Yang (2019). "Summertime precipitation extremes in a EURO-CORDEX 0.11°

- ensemble at an hourly resolution." *Nat. Hazards Earth Syst. Sci.*, 19(4), 957-971. <https://doi.org/10.5194/nhess-19-957-2019>.
- Butcher, J. B., and T. Zi (2019). "Efficient method for updating IDF curves to future climate projections." *arXiv preprint arXiv:1906.04802*.
- Cannon, A. J., and S. Innocenti (2019). "Projected intensification of sub-daily and daily rainfall extremes in convection-permitting climate model simulations over North America: implications for future intensity–duration–frequency curves." *Nat. Hazards Earth Syst. Sci.*, 19(2), 421-440. <https://doi.org/10.5194/nhess-19-421-2019>.
- Chandra, R., U. Saha, and P. P. Mujumdar (2015). "Model and parameter uncertainty in IDF relationships under climate change." *Advances in Water Resources*, 79, 127-139. <https://doi.org/10.1016/j.advwatres.2015.02.011>.
- Donat, M. G., A. L. Lowry, L. V. Alexander, P. A. O’Gorman, and N. Maher (2016). "More extreme precipitation in the world’s dry and wet regions." *Nature Climate Change*, 6(5), 508-513. <https://doi.org/10.1038/nclimate2941>.
- Donat, M. G., J. Sillmann, and E. M. Fischer (2020). "Chapter 3 - Changes in climate extremes in observations and climate model simulations. From the past to the future." *Climate Extremes and their implications for impact and risk assessment*, J. Sillmann, S. Sippel, and S. Russo, eds., Elsevier, 31-57.
- Eekhout, J. P. C., J. E. Hunink, W. Terink, and J. de Vente (2018). "Why increased extreme precipitation under climate change negatively affects water security." *Hydrology and Earth System Sciences*, 22(11), 5935-5946. <https://doi.org/10.5194/hess-22-5935-2018>.
- Fadhel, S., M. A. Rico-Ramirez, and D. Han (2017). "Uncertainty of Intensity–Duration–Frequency (IDF) curves due to varied climate baseline periods." *Journal of Hydrology*, 547, 600-612. <https://doi.org/10.1016/j.jhydrol.2017.02.013>.

- Fischer, E. M., J. Sedláček, E. Hawkins, and R. Knutti (2014). "Models agree on forced response pattern of precipitation and temperature extremes." *Geophysical Research Letters*, 41(23), 8554-8562. <https://doi.org/10.1002/2014GL062018>.
- Fischer, E. M., and R. Knutti (2015). "Anthropogenic contribution to global occurrence of heavy-precipitation and high-temperature extremes." *Nature Climate Change*, 5(6), 560-564. <https://doi.org/10.1038/nclimate2617>.
- Fluixá-Sanmartín, J., A. Morales-Torres, I. Escuder-Bueno, and J. Paredes-Arquiola (2019). "Quantification of climate change impact on dam failure risk under hydrological scenarios: a case study from a Spanish dam." *Natural Hazards Earth System Sciences*, 19(10), 2117-2139. <https://doi.org/10.5194/nhess-19-2117-2019>.
- Forestieri, A., E. Arnone, S. Blenkinsop, A. Candela, H. Fowler, and L. V. Noto (2018). "The impact of climate change on extreme precipitation in Sicily, Italy." *Hydrological Processes*, 32(3), 332-348. <https://doi.org/10.1002/hyp.11421>.
- Fosser, G., E. J. Kendon, D. Stephenson, and S. Tucker (2020). "Convection-permitting models offer promise of more certain extreme rainfall projections." *Geophysical Research Letters*, 47(13), e2020GL088151. <https://doi.org/10.1029/2020GL088151>.
- Ganguli, P., and P. Coulibaly (2019). "Assessment of future changes in intensity-duration-frequency curves for Southern Ontario using North American (NA)-CORDEX models with nonstationary methods." *Journal of Hydrology: Regional Studies*, 22, 100587. <https://doi.org/10.1016/j.ejrh.2018.12.007>.
- Helsen, S., N. P. M. van Lipzig, M. Demuzere, S. Vanden Broucke, S. Caluwaerts, L. De Cruz, R. De Troch, R. Hamdi, P. Termonia, B. Van Schaeybroeck, and H. Wouters (2020). "Consistent scale-dependency of future increases in hourly

- extreme precipitation in two convection-permitting climate models." *Climate Dynamics*, 54(3), 1267-1280. <https://doi.org/10.1007/s00382-019-05056-w>.
- Hodnebrog, Ø., L. Marelle, K. Alterskjær, R. R. Wood, R. Ludwig, E. M. Fischer, T. B. Richardson, P. M. Forster, J. Sillmann, and G. Myhre (2019). "Intensification of summer precipitation with shorter time-scales in Europe." *Environmental Research Letters*, 14(12), 124050. <https://doi.org/10.1088/1748-9326/ab549c>.
- Hosseinzadehtalaei, P., H. Tabari, and P. Willems (2018). "Precipitation intensity–duration–frequency curves for central Belgium with an ensemble of EURO-CORDEX simulations, and associated uncertainties." *Atmospheric Research*, 200, 1-12. <https://doi.org/10.1016/j.atmosres.2017.09.015>.
- Hosseinzadehtalaei, P., H. Tabari, and P. Willems (2020). "Climate change impact on short-duration extreme precipitation and intensity–duration–frequency curves over Europe." *Journal of Hydrology*, 590, 125249. <https://doi.org/10.1016/j.jhydrol.2020.125249>.
- Huo, R., L. Li, H. Chen, C.-Y. Xu, J. Chen, and S. Guo (2021). "Extreme precipitation changes in Europe from the last millennium to the end of the twenty-first century." *Journal of Climate*, 34(2), 567-588. <https://doi.org/10.1175/jcli-d-19-0879.1>.
- Innocenti, S., A. Mailhot, M. Leduc, A. J. Cannon, and A. Frigon (2019). "Projected changes in the probability distributions, seasonality, and spatiotemporal scaling of daily and subdaily extreme precipitation simulated by a 50-member ensemble over Northeastern North America." *Journal of Geophysical Research: Atmospheres*, 124(19), 10427-10449. <https://doi.org/10.1029/2019JD031210>.
- Kendon, E. J., N. M. Roberts, H. J. Fowler, M. J. Roberts, S. C. Chan, and C. A. Senior (2014). "Heavier summer downpours with climate change revealed by weather forecast resolution model." *Nature Climate Change*, 4, 570-576. <https://doi.org/10.1038/nclimate2258>.

- Kendon, E. J., N. Ban, N. M. Roberts, H. J. Fowler, M. J. Roberts, S. C. Chan, J. P. Evans, G. Fosser, and J. M. Wilkinson (2017). "Do convection-permitting regional climate models improve projections of future precipitation change?" *Bulletin of the American Meteorological Society*, 98(1), 79-93. <https://doi.org/10.1175/bams-d-15-0004.1>.
- Kendon, E. J., R. A. Stratton, S. Tucker, J. H. Marsham, S. Berthou, D. P. Rowell, and C. A. Senior (2019). "Enhanced future changes in wet and dry extremes over Africa at convection-permitting scale." *Nature Communications*, 10(1), 1794. <https://doi.org/10.1038/s41467-019-09776-9>.
- Kharin, V. V., F. W. Zwiers, X. Zhang, and M. Wehner (2013). "Changes in temperature and precipitation extremes in the CMIP5 ensemble." *Climatic Change*, 119(2), 345-357. <https://doi.org/10.1007/s10584-013-0705-8>.
- Kharin, V. V., G. M. Flato, X. Zhang, N. P. Gillett, F. Zwiers, and K. J. Anderson (2018). "Risks from climate extremes change differently from 1.5°C to 2.0°C depending on rarity." *Earth's Future*, 6(5), 704-715. <https://doi.org/10.1002/2018EF000813>.
- Khazaei, M. R. (2021). "A robust method to develop future rainfall IDF curves under climate change condition in two major basins of Iran." *Theoretical and Applied Climatology*. <https://doi.org/10.1007/s00704-021-03540-0>.
- Kirchmeier-Young, M. C., and X. Zhang (2020). "Human influence has intensified extreme precipitation in North America." *Proceedings of the National Academy of Sciences*, 117(24), 13308-13313. <https://doi.org/10.1073/pnas.1921628117>.
- Knist, S., K. Goergen, and C. Simmer (2020). "Evaluation and projected changes of precipitation statistics in convection-permitting WRF climate simulations over Central Europe." *Climate Dynamics*, 55(1), 325-341. <https://doi.org/10.1007/s00382-018-4147-x>.

- Lenderink, G R., H. de Vries, H. J. Fowler, R. Barbero, B. van Ulf, and E. van Meijgaard (2021). "Scaling and responses of extreme hourly precipitation in three climate experiments with a convection-permitting model." *Phil. Trans. R. Soc. A*, 379. <https://doi.org/10.1098/rsta.2019.0544>.
- Li, C., F. Zwiers, X. Zhang, G. Li, Y. Sun, and M. Wehner (2020). "Changes in annual extremes of daily temperature and precipitation in CMIP6 models." *Journal of Climate*, 1-61. <https://doi.org/10.1175/jcli-d-19-1013.1>.
- Lima, C. H. R., H.-H. Kwon, and J.-Y. Kim (2016). "A Bayesian beta distribution model for estimating rainfall IDF curves in a changing climate." *Journal of Hydrology*, 540, 744-756. <https://doi.org/10.1016/j.jhydrol.2016.06.062>.
- Luu, L. N., R. Vautard, P. Yiou, and J.-M. Soubeyrou (2021). "Evaluation of convection-permitting extreme precipitation simulations for the south of France." *Earth Syst. Dynam. Discuss.*, preprint. <https://doi.org/10.5194/esd-2020-77>.
- Mantegna, G. A., C. J. White, T. A. Remenyi, S. P. Corney, and P. Fox-Hughes (2017). "Simulating sub-daily Intensity-Frequency-Duration curves in Australia using a dynamical high-resolution regional climate model." *Journal of Hydrology*, 554, 277-291. <https://doi.org/10.1016/j.jhydrol.2017.09.025>.
- Martel, J.-L., A. Mailhot, and F. Brissette (2020). "Global and regional projected changes in 100-yr subdaily, daily, and multiday precipitation extremes estimated from three large ensembles of climate simulations." *Journal of Climate*, 33(3), 1089-1103. <https://doi.org/10.1175/jcli-d-18-0764.1>.
- Morrison, A., G. Villarini, W. Zhang, and E. Scoccimarro (2019). "Projected changes in extreme precipitation at sub-daily and daily time scales." *Global and Planetary Change*, 182, 103004. <https://doi.org/10.1016/j.gloplacha.2019.103004>.

- Moustakis, Y., S. M. Papalexiou, C. J. Onof, A. Paschalis (2021). "Seasonality, intensity and duration of rainfall extremes change in a warmer climate." *Earth's Future*, 9(3). <https://doi.org/10.1029/2020EF001824>.
- Myhre, G., K. Alterskjær, C. W. Stjern, Ø. Hodnebrog, L. Marelle, B. H. Samset, J. Sillmann, N. Schaller, E. Fischer, M. Schulz, and A. Stohl (2019). "Frequency of extreme precipitation increases extensively with event rareness under global warming." *Scientific Reports*, 9(1), 16063. <https://doi.org/10.1038/s41598-019-52277-4>.
- Nie, J., A. H. Sobel, D. A. Shaevitz, and S. Wang (2018). "Dynamic amplification of extreme precipitation sensitivity." *Proceedings of the National Academy of Sciences*, 115(38), 9467-9472. <https://doi.org/10.1073/pnas.1800357115>.
- Pendergrass, A. G., F. Lehner, B. M. Sanderson, and Y. Xu (2015). "Does extreme precipitation intensity depend on the emissions scenario?" *Geophysical Research Letters*, 42(20), 8767-8774. <https://doi.org/10.1002/2015GL065854>.
- Pendergrass, A. G. (2018). "What precipitation is extreme?" *Science*, 360(6393), 1072-1073. <https://doi.org/10.1126/science.aat1871>.
- Pfahl, S., P. A. O’Gorman, and E. M. Fischer (2017). "Understanding the regional pattern of projected future changes in extreme precipitation." *Nature Climate Change*, 7, 423. <https://doi.org/10.1038/nclimate3287>.
- Pichelli, E., E. Coppola, S. Sobolowski, N. Ban, F. Giorgi, P. Stocchi, A. Alias, D. Belušić, S. Berthou, C. Caillaud, R. M. Cardoso, S. Chan, O. B. Christensen, A. Dobler, H. de Vries, K. Goergen, E. J. Kendon, K. Keuler, G. Lenderink, T. Lorenz, A. N. Mishra, H.-J. Panitz, C. Schär, P. M. M. Soares, H. Truhetz, and J. Vergara-Temprado (2021). "The first multi-model ensemble of regional climate simulations



- at kilometer-scale resolution part 2: historical and future simulations of precipitation." *Climate Dynamics*. <https://doi.org/10.1007/s00382-021-05657-4>.
- Prein, A. F., R. M. Rasmussen, K. Ikeda, C. Liu, M. P. Clark, and G. J. Holland (2017a). "The future intensification of hourly precipitation extremes." *Nature Climate Change*, 7(1), 48-52. <https://doi.org/10.1038/nclimate3168>.
- Ragno, E., A. AghaKouchak, C. A. Love, L. Cheng, F. Vahedifard, and C. H. R. Lima (2018). "Quantifying changes in future intensity-duration-frequency curves using multimodel ensemble simulations." *Water Resources Research*, 54(3), 1751-1764. <https://doi.org/10.1002/2017WR021975>.
- Rajczak, J., and C. Schär (2017). "Projections of future precipitation extremes over Europe: A multimodel assessment of climate simulations." *Journal of Geophysical Research: Atmospheres*, 122(20), 10,773-10,800. <https://doi.org/10.1002/2017JD027176>.
- Schardong, A., and S. P. Simonovic (2019). "Application of regional climate models for updating intensity-duration-frequency curves under climate change." <https://doi.org/10.9734/ijecc/2019/v9i530117>.
- Srivastav, R. K., A. Schardong, and S. P. Simonovic (2014). "Equidistance quantile matching method for updating IDF curves under climate change." *Water Resources Management*, 28(9), 2539-2562. <https://doi.org/10.1007/s11269-014-0626-y>.
- Tabari, H., R. De Troch, O. Giot, R. Hamdi, P. Termonia, S. Saeed, E. Brisson, N. Van Lipzig, and P. Willems (2016). "Local impact analysis of climate change on precipitation extremes: are high-resolution climate models needed for realistic simulations?" *Hydrology and Earth System Sciences*, 20(9), 3843-3857. <https://doi.org/10.5194/hess-20-3843-2016>.

- Tabari, H. (2020). "Climate change impact on flood and extreme precipitation increases with water availability." *Scientific Reports*, 10(1), 13768. <https://doi.org/10.1038/s41598-020-70816-2>.
- Vanden Broucke, S., H. Wouters, M. Demuzere, and N. P. M. van Lipzig (2019). "The influence of convection-permitting regional climate modeling on future projections of extreme precipitation: dependency on topography and timescale." *Climate Dynamics*, 52(9), 5303-5324. <https://doi.org/10.1007/s00382-018-4454-2>.
- Vergara-Temprado, J., N. Ban, and C. Schär (2021). "Extreme sub-hourly precipitation intensities scale close to the Clausius-Clapeyron rate over Europe." *Geophysical Research Letters*, 48(3), e2020GL089506. <https://doi.org/10.1029/2020GL089506>.
- Wood, R. R., and R. Ludwig (2020). "Analyzing internal variability and forced response of subdaily and daily extreme precipitation over Europe." *Geophysical Research Letters*, 47(17), e2020GL089300. <https://doi.org/10.1029/2020GL089300>.
